# Supplementary material for: Reliability and validity of the Sidaamu Afoo version of the pelvic organ prolapse symptom score questionnaire
Source: PubMed Central journal article supplement (PMC10283297; doi:10.1186/s12905-023-02478-x), 2023-06-20
Supplement: 12905_2023_2478_MOESM1_ESM.pdf [file 12905_2023_2478_MOESM1_ESM.pdf]

# Pelvic Organ Prolapse Symptom Score

This symptom score can be used from time to time to help you check how your prolapse symptoms are changing.

Answer the following questions, thinking about how you have been, on average, over the **PAST FOUR WEEKS**. *(Please cross one box in each row)*

| How often during the last four weeks have you had the following symptoms: |                                                                                                                                                            | Never                      | Occasion-ally              | Some-times                 | Most of the time           | All of the time            |
|---------------------------------------------------------------------------|------------------------------------------------------------------------------------------------------------------------------------------------------------|----------------------------|----------------------------|----------------------------|----------------------------|----------------------------|
| Q1                                                                        | a feeling of something coming down from or in your vagina?                                                                                                 | <input type="checkbox"/> 0 | <input type="checkbox"/> 1 | <input type="checkbox"/> 2 | <input type="checkbox"/> 3 | <input type="checkbox"/> 4 |
| Q2                                                                        | an uncomfortable feeling or pain in your vagina which is worse when standing?                                                                              | <input type="checkbox"/> 0 | <input type="checkbox"/> 1 | <input type="checkbox"/> 2 | <input type="checkbox"/> 3 | <input type="checkbox"/> 4 |
| Q3                                                                        | a heaviness or dragging feeling in your lower abdomen (tummy)?                                                                                             | <input type="checkbox"/> 0 | <input type="checkbox"/> 1 | <input type="checkbox"/> 2 | <input type="checkbox"/> 3 | <input type="checkbox"/> 4 |
| Q4                                                                        | a heaviness or dragging feeling in your lower back?                                                                                                        | <input type="checkbox"/> 0 | <input type="checkbox"/> 1 | <input type="checkbox"/> 2 | <input type="checkbox"/> 3 | <input type="checkbox"/> 4 |
| Q5                                                                        | a need to strain (push) to empty your bladder?                                                                                                             | <input type="checkbox"/> 0 | <input type="checkbox"/> 1 | <input type="checkbox"/> 2 | <input type="checkbox"/> 3 | <input type="checkbox"/> 4 |
| Q6                                                                        | a feeling that your bladder has not emptied completely?                                                                                                    | <input type="checkbox"/> 0 | <input type="checkbox"/> 1 | <input type="checkbox"/> 2 | <input type="checkbox"/> 3 | <input type="checkbox"/> 4 |
| Q7                                                                        | a feeling that your bowel has not emptied completely?                                                                                                      | <input type="checkbox"/> 0 | <input type="checkbox"/> 1 | <input type="checkbox"/> 2 | <input type="checkbox"/> 3 | <input type="checkbox"/> 4 |
| Q8                                                                        | which of the symptoms above (questions Q1 to Q7) causes you most bother?<br><i>Please enter a number from 1 to 7 in the box, or cross "Not applicable"</i> |                            |                            | Q <input type="checkbox"/> | Not applicable             | <input type="checkbox"/>   |
